# Supplementary material for: The Effect of Canagliflozin, a Sodium Glucose Cotransporter 2 Inhibitor, on Glycemic End Points Assessed by Continuous Glucose Monitoring and Patient-Reported Outcomes Among People With Type 1 Diabetes
Source: Oxford University Press journal article supplement (doi:10.2337/dc16-1353), 2016-11-29
Supplement: dc161353supplementarydata.pdf [file dc161353supplementarydata.pdf]

SUPPLEMENTARY DATA

**Supplementary Figure 1. Representative CGM profiles of change in mean glucose over 4 days for individual participants.**

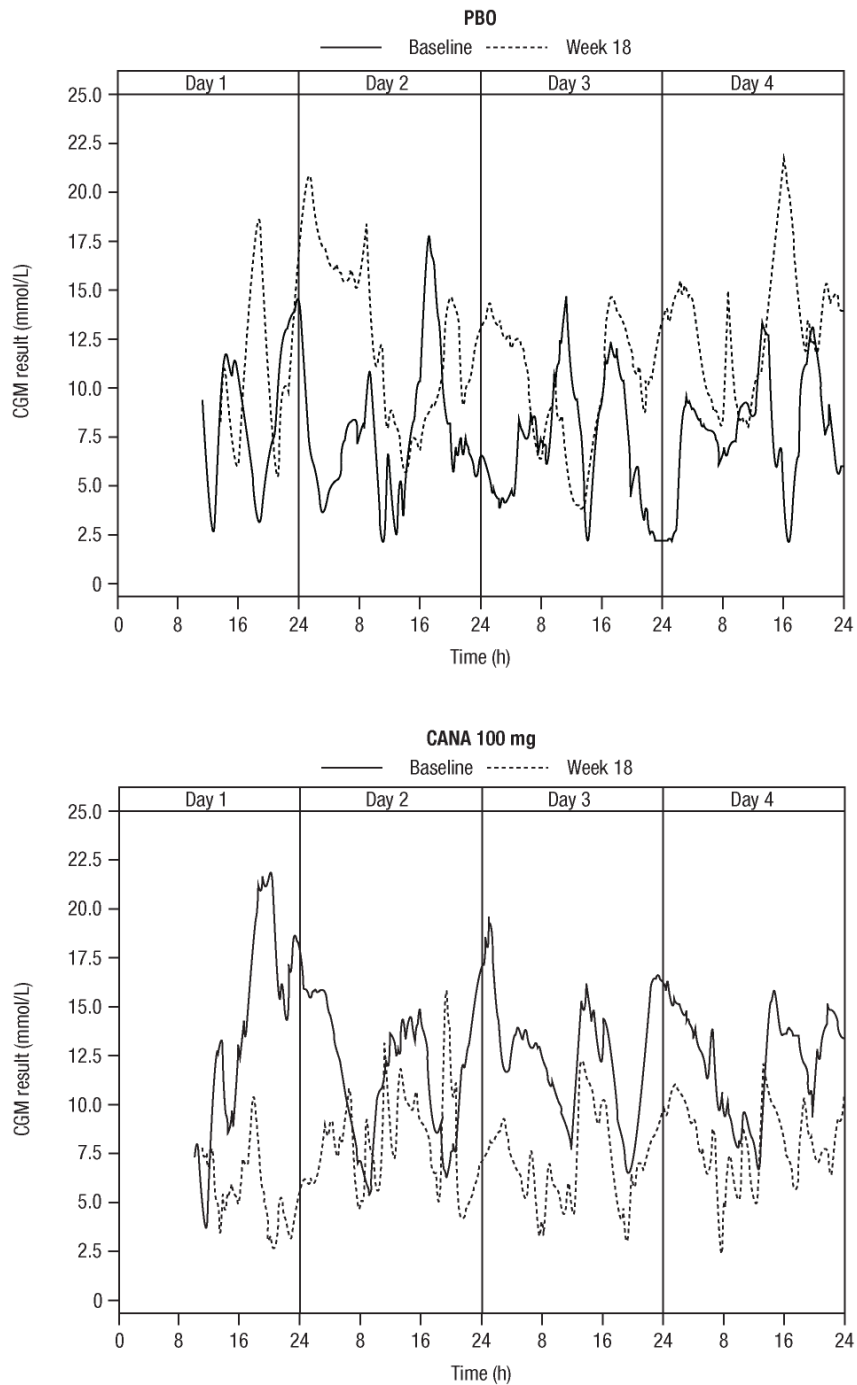

CGM, continuous glucose monitoring; CANA, canagliflozin; PBO, placebo.

SUPPLEMENTARY DATA

**Supplementary Figure 2. Proportion of participants with (A) any improvement in individual DTSQc treatment satisfaction scale score items and (B) less self-reported time spent in hyperglycemia and hypoglycemia at Week 18.**

**A.**

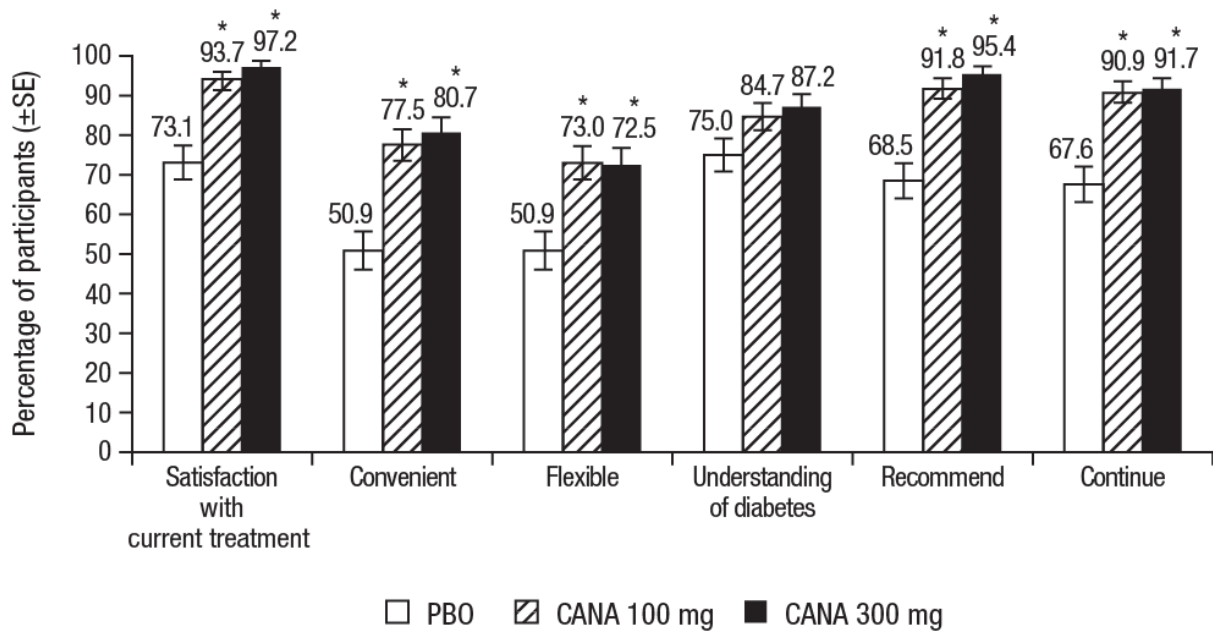

**B.**

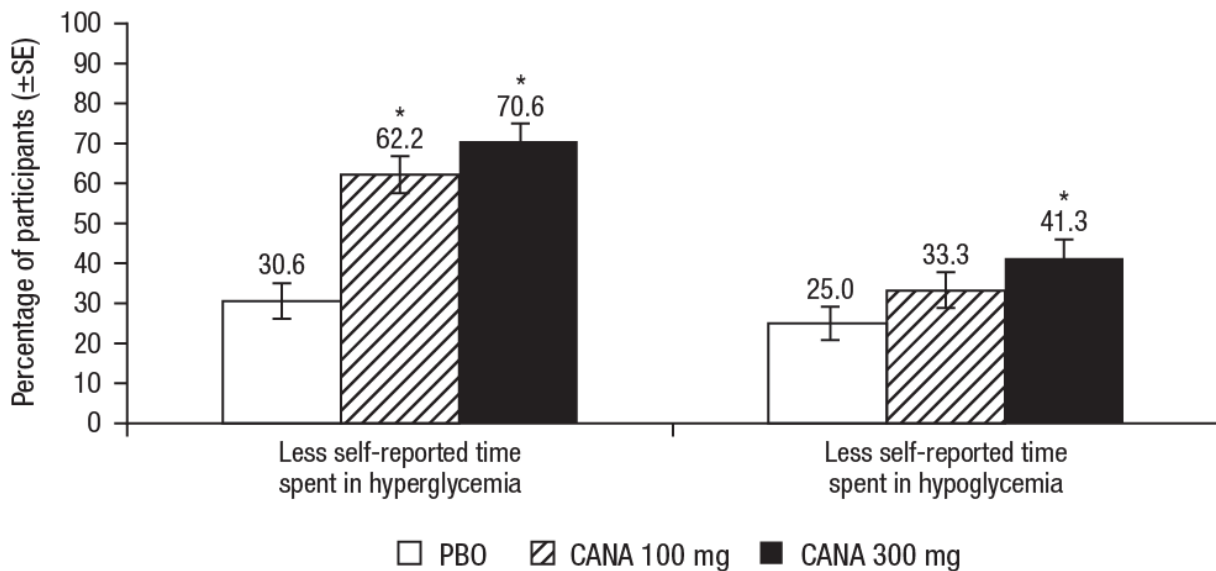

DTSQc, Diabetes Treatment Satisfaction Questionnaire change version; CANA, canagliflozin; PBO, placebo; SE, standard error; CI, confidence interval.

\*95% CI for the odds ratio between canagliflozin and placebo excludes 1.
